# Supplementary material for: Molecular diversity and population structure of Chinese green foxtail [Setaria viridis (L.) Beauv.] revealed by microsatellite analysis
Source: PubMed Central journal article supplement — J Exp Bot. 2013 Aug 14;64(12):3645–56. doi: 10.1093/jxb/ert198 (PMC3745726; doi:10.1093/jxb/ert198), 2013-08-14
Supplement: supp_ert198_jexbot097238_file001.pdf [file supp_ert198_jexbot097238_file001.pdf]

## Supporting materials:

**Table S1.** Genetic diversities identified using SSRs in 288 green foxtail accessions.

| Marker | GenotypeNo | AlleleNo | GeneDiversity | Heterozygosity | PIC    |
|--------|------------|----------|---------------|----------------|--------|
| b159   | 77.0000    | 36.0000  | 0.9546        | 0.2025         | 0.9528 |
| b165   | 38.0000    | 33.0000  | 0.9480        | 0.0263         | 0.9456 |
| b180   | 55.0000    | 42.0000  | 0.9561        | 0.0964         | 0.9545 |
| b186   | 49.0000    | 43.0000  | 0.9632        | 0.0294         | 0.9620 |
| b236   | 74.0000    | 54.0000  | 0.9728        | 0.3452         | 0.9721 |
| b237   | 34.0000    | 23.0000  | 0.8935        | 0.0650         | 0.8862 |
| b241   | 53.0000    | 41.0000  | 0.9648        | 0.0474         | 0.9636 |
| b266   | 40.0000    | 16.0000  | 0.7946        | 0.1773         | 0.7661 |
| MPGD13 | 18.0000    | 12.0000  | 0.8027        | 0.0403         | 0.7780 |
| MPGA32 | 40.0000    | 20.0000  | 0.8721        | 0.1279         | 0.8600 |
| p4     | 47.0000    | 44.0000  | 0.8565        | 0.0451         | 0.8457 |
| p29    | 58.0000    | 45.0000  | 0.9555        | 0.0800         | 0.9538 |
| p45    | 23.0000    | 21.0000  | 0.7945        | 0.0159         | 0.7755 |
| p80    | 47.0000    | 38.0000  | 0.9561        | 0.0804         | 0.9543 |
| si227  | 51.0000    | 40.0000  | 0.9495        | 0.0620         | 0.9472 |
| b174   | 77.0000    | 45.0000  | 0.9664        | 0.1629         | 0.9653 |
| p20    | 44.0000    | 38.0000  | 0.9228        | 0.0302         | 0.9189 |
| p3     | 46.0000    | 42.0000  | 0.9619        | 0.0141         | 0.9605 |
| b218   | 59.0000    | 46.0000  | 0.9441        | 0.0504         | 0.9415 |
| b182   | 40.0000    | 35.0000  | 0.9555        | 0.0224         | 0.9537 |
| B1     | 19.0000    | 13.0000  | 0.7641        | 0.0493         | 0.7291 |
| b101   | 51.0000    | 49.0000  | 0.9635        | 0.0145         | 0.9623 |
| b102   | 44.0000    | 42.0000  | 0.9648        | 0.0234         | 0.9636 |
| b109   | 42.0000    | 22.0000  | 0.9320        | 0.1042         | 0.9279 |
| b117   | 21.0000    | 16.0000  | 0.8130        | 0.0235         | 0.7943 |
| b123   | 36.0000    | 25.0000  | 0.9167        | 0.0389         | 0.9112 |
| b126   | 39.0000    | 36.0000  | 0.9545        | 0.0111         | 0.9526 |
| b145   | 39.0000    | 31.0000  | 0.9552        | 0.0317         | 0.9534 |
| b153   | 141.0000   | 53.0000  | 0.9173        | 0.6469         | 0.9124 |
| b163   | 40.0000    | 27.0000  | 0.9380        | 0.0617         | 0.9345 |
| b169   | 35.0000    | 31.0000  | 0.9505        | 0.0163         | 0.9483 |
| b171   | 52.0000    | 31.0000  | 0.9558        | 0.0970         | 0.9540 |
| b181   | 41.0000    | 33.0000  | 0.9427        | 0.0316         | 0.9399 |
| b185   | 53.0000    | 30.0000  | 0.8734        | 0.1993         | 0.8629 |
| b187   | 40.0000    | 35.0000  | 0.9119        | 0.0185         | 0.9080 |
| b189   | 48.0000    | 38.0000  | 0.9651        | 0.0498         | 0.9639 |

|               |          |         |        |        |        |
|---------------|----------|---------|--------|--------|--------|
| <b>b200</b>   | 27.0000  | 22.0000 | 0.9130 | 0.0211 | 0.9069 |
| <b>b217</b>   | 43.0000  | 40.0000 | 0.9486 | 0.0112 | 0.9463 |
| <b>b224</b>   | 46.0000  | 42.0000 | 0.9607 | 0.0195 | 0.9592 |
| <b>b242</b>   | 41.0000  | 37.0000 | 0.9506 | 0.0149 | 0.9484 |
| <b>b246</b>   | 57.0000  | 54.0000 | 0.9750 | 0.0175 | 0.9744 |
| <b>b247</b>   | 52.0000  | 40.0000 | 0.9516 | 0.0522 | 0.9495 |
| <b>b249</b>   | 57.0000  | 47.0000 | 0.9620 | 0.0469 | 0.9607 |
| <b>b250</b>   | 64.0000  | 54.0000 | 0.9345 | 0.0735 | 0.9314 |
| <b>b258</b>   | 107.0000 | 58.0000 | 0.9485 | 0.2694 | 0.9462 |
| <b>b269</b>   | 34.0000  | 31.0000 | 0.9142 | 0.0115 | 0.9092 |
| <b>MPGA31</b> | 21.0000  | 17.0000 | 0.8054 | 0.0182 | 0.7831 |
| <b>MPGA50</b> | 32.0000  | 28.0000 | 0.9291 | 0.0287 | 0.9248 |
| <b>MPGD44</b> | 22.0000  | 19.0000 | 0.8741 | 0.0120 | 0.8624 |
| <b>p10</b>    | 33.0000  | 28.0000 | 0.8729 | 0.0215 | 0.8628 |
| <b>p14</b>    | 70.0000  | 44.0000 | 0.9326 | 0.1131 | 0.9293 |
| <b>p17x</b>   | 83.0000  | 40.0000 | 0.9178 | 0.2057 | 0.9127 |
| <b>p2</b>     | 44.0000  | 34.0000 | 0.9505 | 0.0430 | 0.9482 |
| <b>p32</b>    | 39.0000  | 24.0000 | 0.8110 | 0.0623 | 0.7952 |
| <b>p33</b>    | 24.0000  | 11.0000 | 0.7021 | 0.0570 | 0.6678 |
| <b>p41</b>    | 92.0000  | 40.0000 | 0.9327 | 0.3271 | 0.9289 |
| <b>p42</b>    | 20.0000  | 13.0000 | 0.7949 | 0.0308 | 0.7687 |
| <b>p44</b>    | 40.0000  | 29.0000 | 0.7180 | 0.0542 | 0.6981 |
| <b>p59</b>    | 41.0000  | 36.0000 | 0.9529 | 0.0295 | 0.9509 |
| <b>p78</b>    | 34.0000  | 31.0000 | 0.8640 | 0.0134 | 0.8567 |
| <b>p8</b>     | 26.0000  | 22.0000 | 0.8711 | 0.0215 | 0.8589 |
| <b>p88</b>    | 48.0000  | 37.0000 | 0.9349 | 0.0912 | 0.9315 |
| <b>p89</b>    | 83.0000  | 46.0000 | 0.9618 | 0.2103 | 0.9605 |
| <b>p98</b>    | 41.0000  | 26.0000 | 0.8726 | 0.0737 | 0.8608 |
| <b>Si017</b>  | 25.0000  | 23.0000 | 0.8090 | 0.0217 | 0.7881 |
| <b>Si119</b>  | 29.0000  | 25.0000 | 0.8588 | 0.0148 | 0.8479 |
| <b>Si132</b>  | 42.0000  | 35.0000 | 0.9439 | 0.0270 | 0.9411 |
| <b>x298</b>   | 39.0000  | 27.0000 | 0.9274 | 0.0645 | 0.9230 |
| <b>x4</b>     | 33.0000  | 26.0000 | 0.8688 | 0.0439 | 0.8577 |

**Table S2.** Comparisons of genetic diversity between wild green foxtail and cultivated foxtail millet

| Sample          | Allele No | Genotype No | Gene Diversity | Heterozygosity | PIC           |
|-----------------|-----------|-------------|----------------|----------------|---------------|
| <b>Wild</b>     |           |             |                |                |               |
| Average         | 33.5072   | 46.3768     | 0.9082         | 0.0763         | 0.9010        |
| Range           | 12~54     | 21~141      | 0.7021~0.9750  | 0.0111~0.6469  | 0.6687~0.9744 |
| Std.            | 11.2689   | 21.1459     | 0.0649         | 0.1012         | 0.0729        |
| <b>Landrace</b> |           |             |                |                |               |
| Average         | 21.4348   | 25.0290     | 0.8598         | 0.0177         | 0.8447        |
| Range           | 6~41      | 6~46        | 0.6310~0.9514  | 0~0.0444       | 0.5937~0.9528 |
| Std.            | 9.1273    | 10.2081     | 0.0898         | 0.0156         | 0.1038        |

**Table S3.** List of annotated genes co-localized with SSR loci detected as genomic regions under selection

| SSR Loci<br>(Fst value) | Blast bit                       | Putative gene | Functional annotation                    |
|-------------------------|---------------------------------|---------------|------------------------------------------|
| B1<br>(0.2044)          | Chr9<br>(56,195,798~56,196,056) | Si037298m     | ubiquitin-conjugating enzyme E2-21 kDa 1 |
| P33<br>(0.2186)         | Chr1<br>(33,331,843~33,332,002) | Si017865m     | DREB-like protein                        |
| X4<br>(0.2325)          | Chr9<br>(98,538~98,850)         | Si033907m     | PDR-like ABC transporter                 |
| P10<br>(0.1422)         | Chr6<br>(7,486,774~7,486,973)   | Si015085m     | transmembrane transport                  |
| Si132<br>(0.1169)       | Chr9<br>(45339944~45340318)     | Si038719m     | E3 ubiquitin-protein ligase RFWD3        |

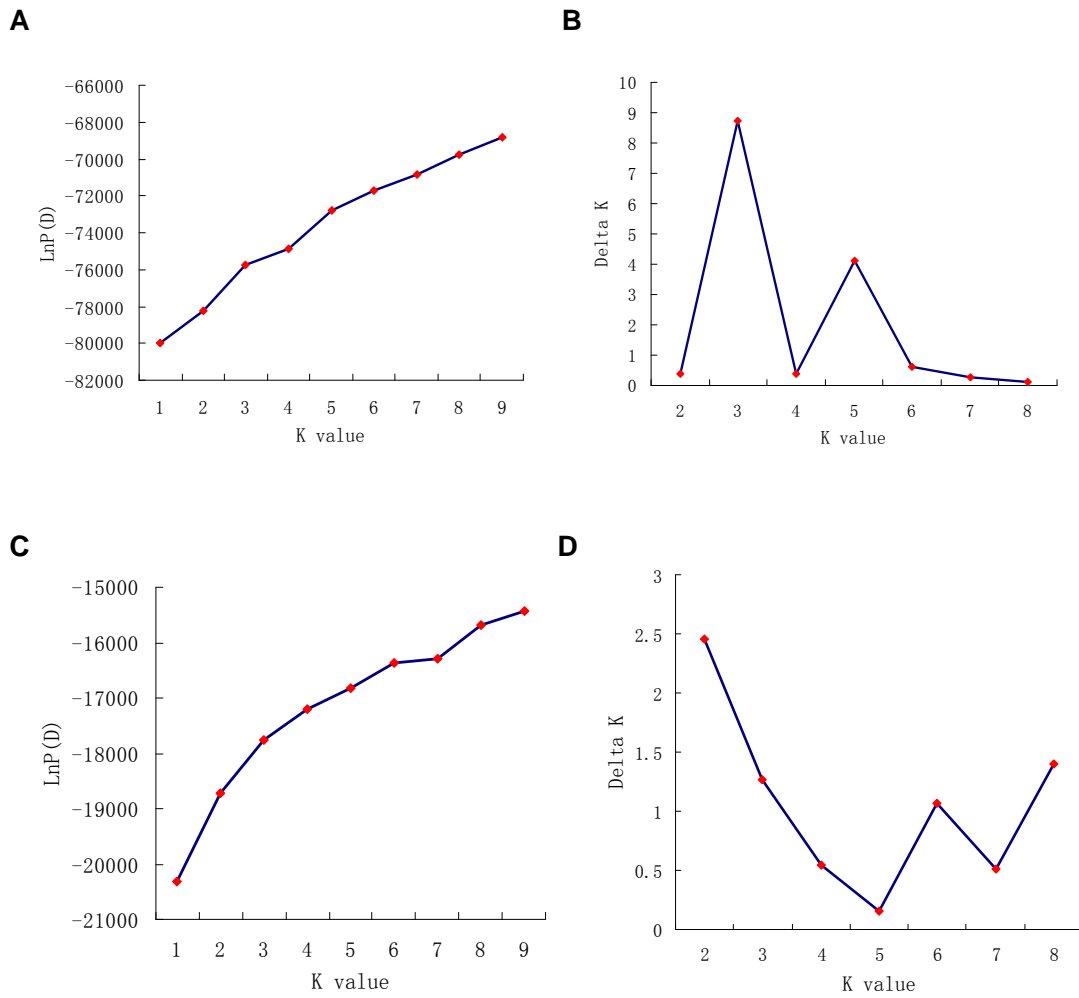

**Figure S1.** Determinations of value of K for substructuring. **(A)** and **(B)**: Optimal K identified by LnP(D) and delta K of PopA; **(C)** and **(D)**: Optimal K identified by LnP(D) and delta K of PopB.

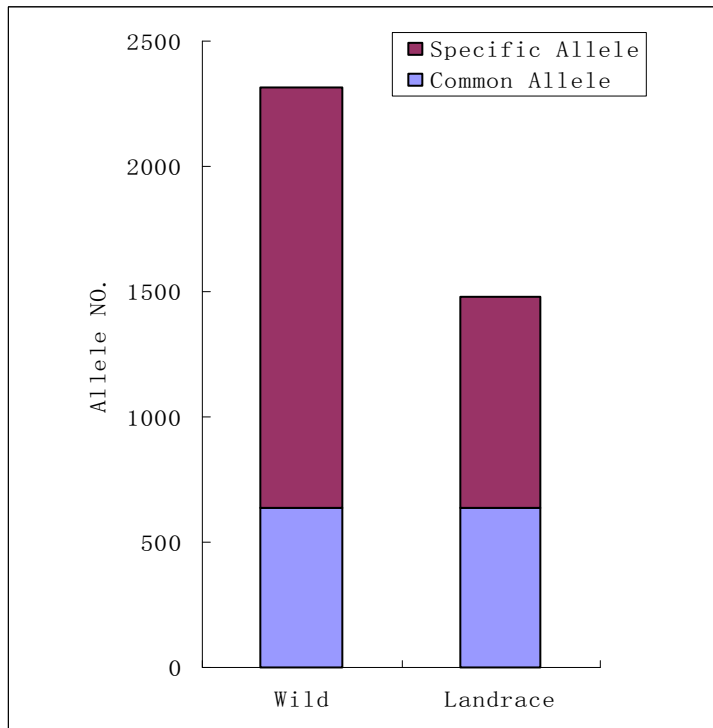

**Figure S2.** Sharing and specific alleles of wild green foxtail and domesticated foxtail millet detected using SSRs.

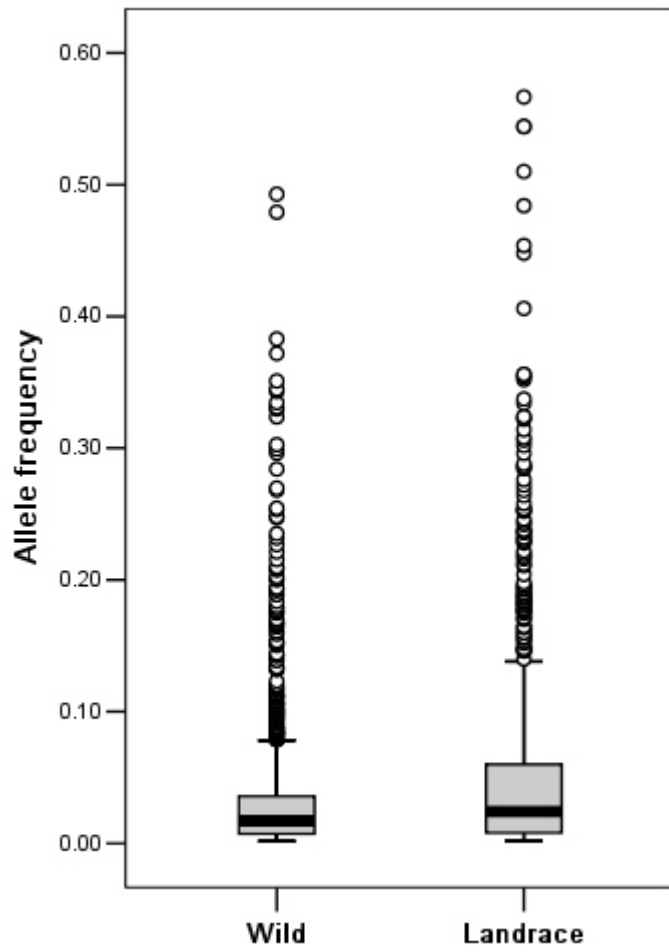

**Figure S3.** Allele frequencies of SSR loci in wild green foxtail and cultivated foxtail millet landraces.

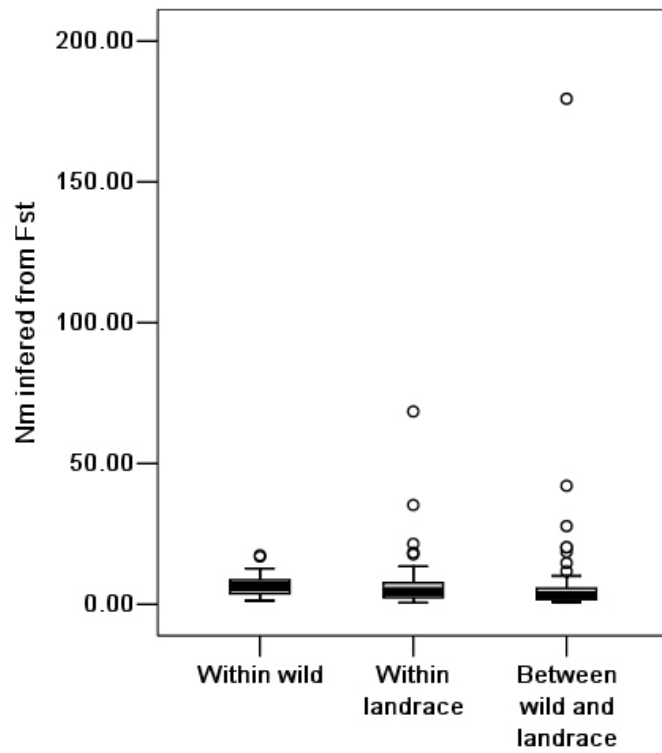

**Figure S4.** Gene flow estimated by Nm inferred from classical  $F$  test within and between green foxtail and foxtail millet.

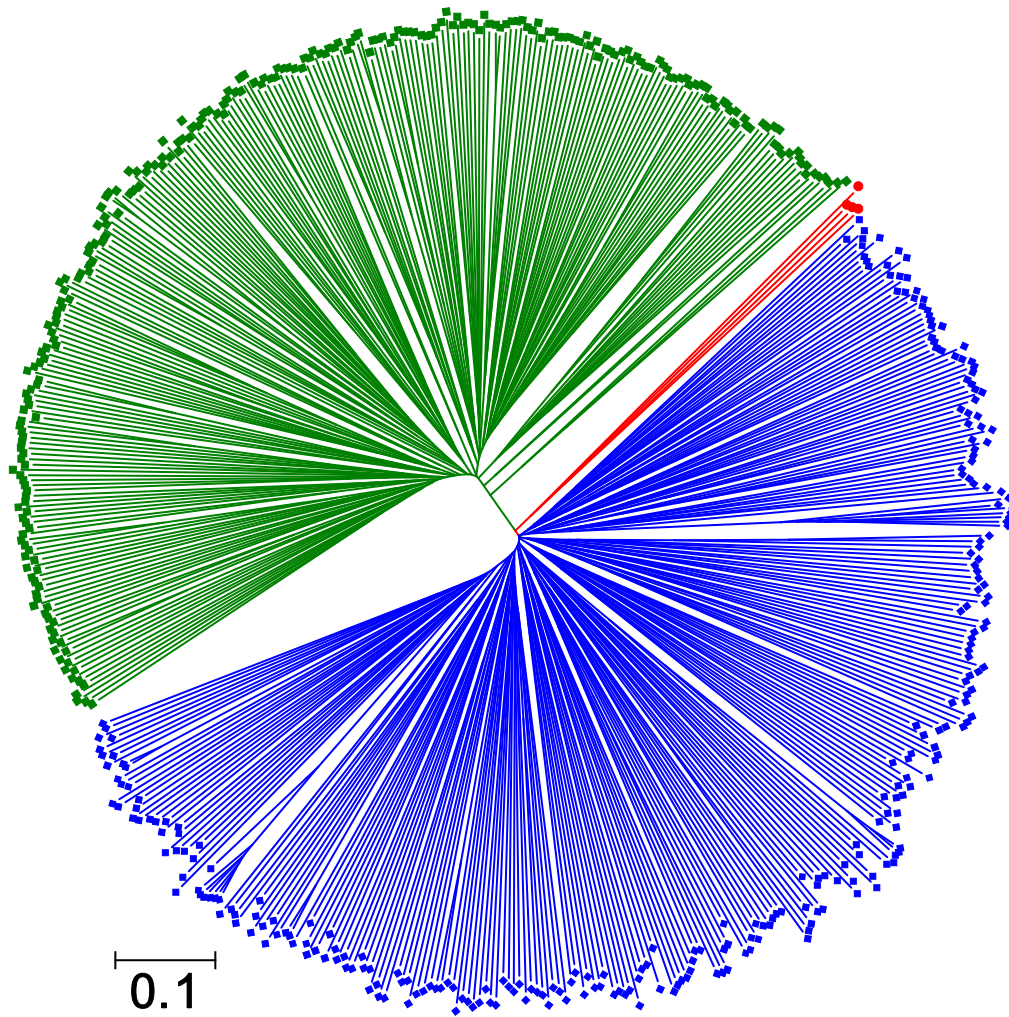

**Figure S5.** Unrooted neighbor-joining tree of Chinese *S. viridis* (Blue) and *S. italica* (Green), four accessions of *S. viridis* (Red) from north China (Chaoyang, Wuan, Changli and Dingxi) were genetically closer with domesticated *S. italica*.
